# Supplementary material for: Prioritizing surveillance of Nipah virus in India
Source: PLOS journal article supplement (doi:10.1371/journal.pntd.0007393), 2019-06-27
Supplement: S7 (10.1371/journal.pntd.0007393.s007) [file journal.pntd.0007393.s007]

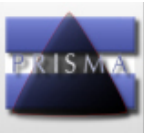

## PRISMA 2009 Flow Diagram

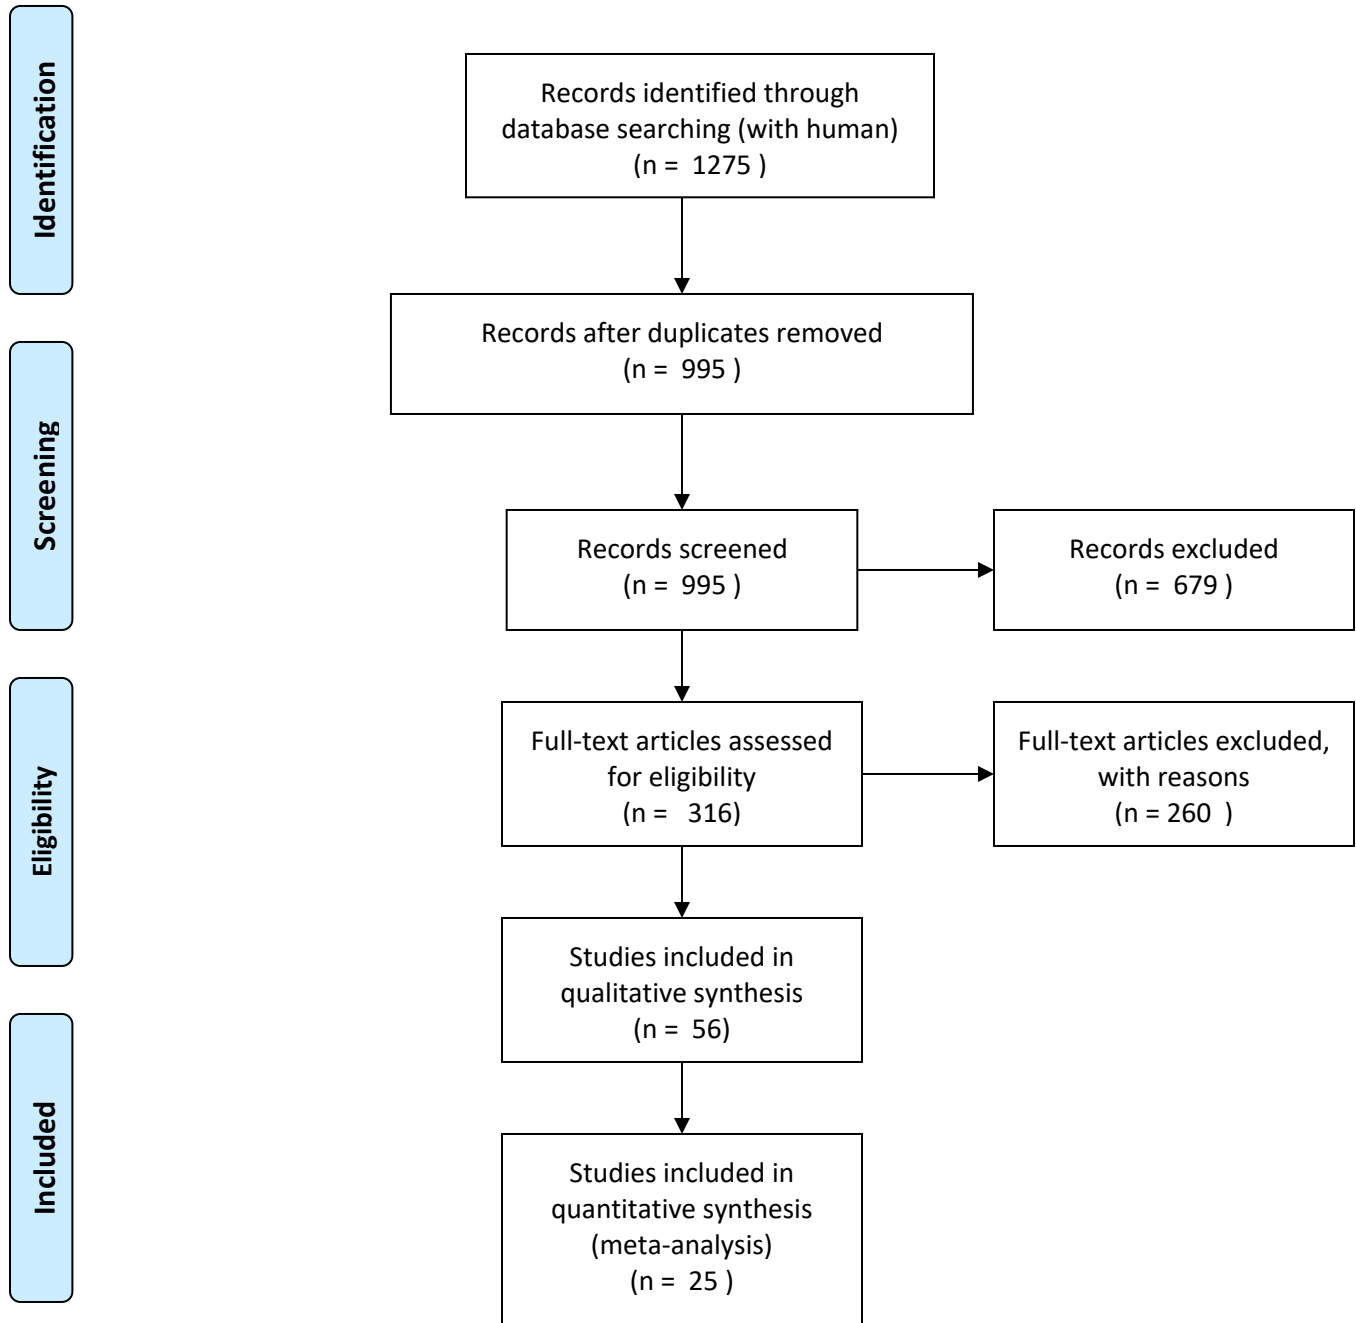

From: Moher D, Liberati A, Tetzlaff J, Altman DG, The PRISMA Group (2009). Preferred Reporting Items for Systematic Reviews and Meta-Analyses: The PRISMA Statement. PLoS Med 6(7): e1000097. doi:10.1371/journal.pmed1000097

For more information, visit [www.prisma-statement.org](http://www.prisma-statement.org).
